# Supplementary material
Source: MDPI journal article supplement (https://www.mdpi.com/1999-4907/11/7/758)
Supplement: s1 [file s1]

## Supplementary Materials

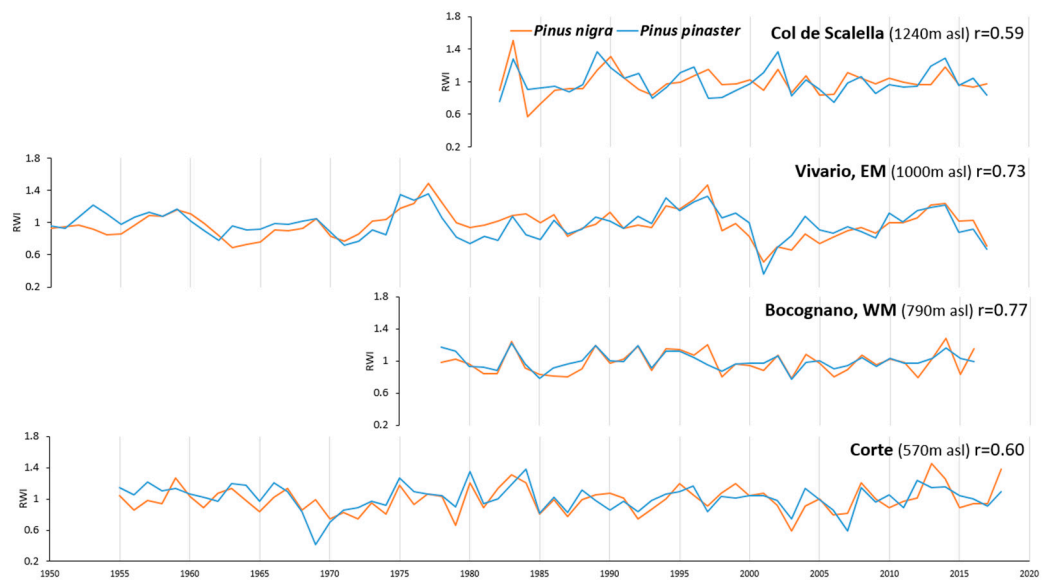

**Figure S1.** Comparison of tree-ring width chronologies of *Pinus nigra* and *Pinus pinaster* at four study sites located between 570 and 1240 m asl.
